# Supplementary material for: Raw Data to Results: A Hands-On Introduction and Overview of Computational Analysis for Single-Molecule Localization Microscopy
Source: PubMed Central journal article supplement (PMC9580916; doi:10.3389/fbinf.2021.817254), 2022-02-01
Supplement: DataSheet1.pdf [file DataSheet1.pdf]

# Supplementary information

Belonging to:

## Raw data to results: a hands-on introduction and overview of computational analysis for single-molecule localization microscopy

Koen J.A. Martens<sup>1,2</sup>, Bartosz Turkowyd<sup>1,2,3</sup>, Ulrike Endesfelder<sup>1,2,3</sup>

<sup>1</sup>Department of Physics, Carnegie Mellon University, Pittsburgh, Pennsylvania, US

<sup>2</sup>Institute for Microbiology and Biotechnology, Rheinische-Friedrich-Wilhelms-Universität Bonn, Bonn, Germany

<sup>3</sup>Department of Systems and Synthetic Microbiology, Max Planck Institute for Terrestrial Microbiology and LOEWE Center for Synthetic Microbiology (SYNMIKRO), Marburg, Germany

\*corresponding author, email: [endesfelder@uni-bonn.de](mailto:endesfelder@uni-bonn.de)

### Table of content:

**Supplementary Pseudocode 1 – 9**

**Supplementary Table 1**

# Supplementary Pseudocode 1

## Module 1: Temporal median filter

```
READ microscopy movie
FOR every frame in the movie
  FOR every pixel in the frame
    OBTAIN data range over which the median should be calculated
    CALCULATE the median value of the data range
    SUBTRACT the median value from current pixel/frame in the movie
    and store the value in a new matrix
  ENDFOR
ENDFOR
```

# Supplementary Pseudocode 2

## Module 2: Localization

```
READ temporally-filtered-movie and raw microscopy movie
FOR every frame in the movie
    CALCULATE difference-of-Gaussian frame to enhance features
    OBTAIN local maxima that have an intensity higher than a set value
based on temporally-filtered-movie
    FOR every local maxima found in this frame
        OBTAIN local region-of-interest around this local maximum in
raw microscopy movie
        CALL localization_ROI with local region-of-interest RETURNING
coordinates
        CALCULATE true position of emitter: add the localization
coordinates to the position of the local maximum corner
    ENDFOR
ENDFOR
```

### Functions:

#### Option 1: localization with phasor: also see [doi.org/10.1063/1.5005899](https://doi.org/10.1063/1.5005899)

**localization\_ROI** with local region-of-interest:

```
READ local region-of-interest
CALCULATE 2-dimensional Fourier transform (FT) of local region-of-
interest
EXTRACT first harmonic in x- and y-direction
CALCULATE position of maximum of first harmonic frequency in x-
direction by determining the angle of the harmonic frequency value in
a phasor plot
CALCULATE position of maximum of first harmonic frequency in y-
direction by determining the angle of the harmonic frequency value in
a phasor plot
CALL photometry_intensity_calculation with local region-of-interest
RETURNING intensity
RETURN coordinates and intensity
```

**photometry\_intensity\_calculation** with local region-of-interest:

```
READ local region-of-interest
FOR every pixel in the local region-of-interest
    CALCULATE distance from pixel to center of region-of-interest
    IF distance is lower than radius of the region-of-interest
        ADD pixel to SignalMap
    ELSEIF distance is higher than radius of the region-of-interest
        ADD pixel to BackgroundMap
    ENDIF
ENDFOR
CALCULATE 56th-percentile of intensity of all pixels in BackgroundMap
(also see doi.org/10.1016/j.bpj.2016.07.047)
SUBTRACT the obtained background intensity for every pixel in the
SignalMap
CALCULATE sum of intensity of all pixels in the SignalMap
RETURN intensity
```

#### Option 2: localization with 2D-Gaussian fitting (not in module)

**localization\_ROI** with local region-of-interest:

```
READ local region-of-interest
SET initial fit parameters
WHILE fitting is ongoing
    CALCULATE goodness-of-fit between local region-of-interest and
2D Gaussian distribution with current parameters
```

```
IF fit is good enough
    RETURN fit parameters
ELSEIF fit is not good enough
    COMPUTE new fit parameters
ENDIF
ENDIF
```

# Supplementary Pseudocode 3

## Module 3: Localization merging

```
READ localization data
FOR each localization
    CALCULATE the nearest neighbor in the next 2 frames
    IF the distance to the nearest neighbor is lower than a predefined
    value
        IF this localization is already part of a trajectory
            SET the trajectory-id of the nearest neighbour to the
            trajectory-id of the localization
        ELSE (if this localization is not already part of a trajectory)
            SET the trajectory-id of this localization and the
            nearest neighbour to the value of tracking-id
            INCREASE the value of tracking-id by 1
        ENDIF
    ENDIF
ENDFOR
FOR each trajectory
    CALCULATE the mean position weighted by intensity, and sum of
    intensity
    ADD linked molecule to new merged localization list
ENDFOR
FOR each localization that is not part of a trajectory
    ADD the localization to the merged localization list
ENDFOR
```

# Supplementary Pseudocode 4

## Module 4: Drift correction

### Module 4a: Fiducial marker drift correction

```
READ localization data
INITIALISE tracking-id to 1
FOR each localization
    CALCULATE the nearest neighbor in the next frame
    IF the distance to the nearest neighbor is lower than a predefined
    value
        IF this localization is already part of a trajectory
            SET the trajectory-id of the nearest neighbour to the
            trajectory-id of the localization
        ELSE (if this localization is not already part of a trajectory)
            SET the trajectory-id of this localization and the
            nearest neighbour to the value of tracking-id
            INCREASE the value of tracking-id by 1
        ENDIF
    ENDIF
ENDFOR
FOR each trajectory
    IF this trajectory has a localization on every frame of the movie
        SET this trajectory as a valid fiducial marker trajectory
    ENDIF
ENDFOR
COMPUTE the average movement of all fiducial marker trajectories on every
frame
FOR each frame
    CALCULATE the average drift with respect to the first frame
ENDFOR
FOR each localization
    SUBTRACT the average drift
ENDFOR
```

### Module 4b: Cross-correlation drift correction

```
READ localization data
COMPUTE two datasets that divide localization data correctly
CALCULATE two-dimensional histograms from localization data based on
(Module 6)
FOR each histogram
    CALCULATE the cross-correlation between this histogram and the first
    histogram
    CALCULATE the position of maximum intensity of the cross-correlation
    CALCULATE the shift of the maximum position from this histogram to
    the first histogram
ENDFOR
CALCULATE the interpolation between the found shifts to encompass all
frames
FOR each frame
    SUBTRACT the drift found on this frame from all localizations on this
    frame
ENDFOR
```

# Supplementary Pseudocode 5

## Module 5: Chromatic aberration correction

**READ** pair-wise datapoints in green and red channel

**COMPUTE** 2-dimensional affine transformation based on the pair-wise datapoints

**COMPUTE** corrected red-channel image based on affine transformation

**COMPUTE** corrected red-channel localization list based on affine transformation

# Supplementary Pseudocode 6

## Pseudo-code belonging to Module 6: Image generation

### Option 1: Image generation by binning the data and convolution

```
READ localization data
SET pixel size
SET convolution kernel
COMPUTE the two-dimensional histogram from localization data
COMPUTE the convolution of the two-dimensional histogram and convolution kernel
```

### Option 2: Image generation by linear interpolation

```
READ localization data
SET pixel size
FOR each localization
    CALCULATE the corresponding pixel bin
    CALCULATE the distance to the bin center
    CALCULATE the intensity interpolation to neighboring pixels
    COMPUTE the increased intensity to all bins
ENDFOR
```

### Option 3: Image generation by Gaussian rendering

```
READ localization data
SET pixel size
FOR each localization
    COMPUTE region of interest (ROI) around emitter center sized 3x Gaussian standard deviation
    FOR every pixel in the ROI
        CALCULATE the value of the Gaussian distribution (centered at the localization position) in this pixel
        COMPUTE the increased intensity to this pixel
    ENDFOR
ENDFOR
```



# Supplementary Pseudocode 7

## Module 7: Single particle tracking

```
READ localization data
INITIALISE tracking-id to 1
FOR each localization
    CALCULATE the nearest neighbor in the next frame or the next 2 frames
    IF the distance to the nearest neighbor is lower than a predefined
value
        IF this localization is already part of a trajectory
            SET the trajectory-id of the nearest neighbour to the
            trajectory-id of the localization
        ELSE (if this localization is not already part of a trajectory)
            SET the trajectory-id of this localization and the
            nearest neighbour to the value of tracking-id
            INCREASE the value of tracking-id by 1
        ENDIF
    ENDIF
ENDFOR
FOR each trajectory
    FOR each localization in the trajectory
        COMPUTE all jump distances
    ENDFOR
    COMPUTE the mean jump distance of this trajectory
ENDFOR
```

### Single particle tracking quantification: Jump Distance (JD) histogram

```
COMPUTE a histogram of all jump distance values
COMPUTE the fit of this histogram with one or multiple Rayleigh
distributions
```

### Single particle tracking quantification: Mean Jump Distance (MJD) histogram

```
COMPUTE a histogram of all mean jump distance values (possibly weighted by
trajectory length)
COMPUTE the fit of this histogram with one or multiple Gaussian
distributions
```

# Supplementary Pseudocode 8

## Module 8: Localization clustering (DBSCAN)

```
READ localization data
FOR each localization
    COMPUTE the nearest neighbor in all frames, store the distance and
    the nearest neighbor index
    IF the localization has at least a predetermined minimum number of
    neighbours
        SET core-status to TRUE
        SET cluster-status to TRUE
    ENDIF
ENDIFOR
FOR each localization
    IF the localization is not core
        IF the localization has at least 1 core neighbour
            SET cluster-status to TRUE
        ENDIF
    ENDIF
ENDIFOR
INITIALISE label-id to 1
FOR each localization
    IF the localization is core
        IF the localization does not have an assigned label
            SET the localization label to the label-id
            CALL recursion loop
        ENDIF
    ENDIF
    INCREASE label-id by 1
ENDIFOR

RECURSION LOOP:
IF the localization is cluster
    IF the localization does not have an assigned label
        SET the localization label to the label-id
        IF the localization is core
            FOR all neighbours of this localization under a
            predetermined distance
                CALL recursion loop
            ENDFOR
        ENDIF
    ENDIF
ENDIF
ENDIF
```

# Supplementary Pseudocode 9

## Module 9: resolution/accuracy determination

### Module 9a: Fourier Ring Correlation (FRC)

```
READ drift-corrected localization data
FOR every localization
    DETERMINE to which of two data arrays the localization will be
    randomly added
END
COMPUTE two images from the two localization data arrays (Module 6)
COMPUTE the normalization of both images (total sum of each image should be
1)
COMPUTE Fourier Transform (FT) of both images
COMPUTE  $f1f2^*$ : FT of image 1 multiplied by the conjugate of FT of image 2
COMPUTE  $f1^2$ : squared FT of image 1
COMPUTE  $f2^2$ : squared FT of image 2
INITIALISE a map of the same size as the images
CALCULATE the integer (rounded) distance of every pixel in the map to the
center of the map
FOR every distance found in the distance map
    COMPUTE the pixels that correspond to the ring of this distance
    COMPUTE the sum of the values in  $f1f2^*$  in this pixelated ring and
store in an array
    COMPUTE the sum of the values in  $f1^2$  in this pixelated ring and
store in an array
    COMPUTE the sum of the values in  $f2^2$  in this pixelated ring and
store in an array
    COMPUTE the FRC value at this distance: divide the value of (the sum
of the values in this ring of)  $f1f2^*$  by  $\sqrt{f1^2*f2^2}$ 
ENDFOR
COMPUTE the resolution by finding where the FRC values cross the line 1/7
```

### Module 9b: NeNA resolution determination

```
READ drift-corrected localization data
FOR all localizations
    CALCULATE the nearest neighbor in the next frame
    IF the distance to the nearest neighbor is lower than a predefined
value
        ADD the distance to an ongoing list of distances
    ENDIF
ENDFOR
COMPUTE a histogram of all values in the list of distances
CALCULATE the best fit of the data with the NeNA formula (noncentral Chi
distribution)
```

# Supplementary Table 1

Overview of software or plug-ins that contain (methods similar to) the modules in this manuscript.

| Software /plug-in      | Module 1: Temporal median image filtering | Module 2: Localization | Module 3: Localization merging | Module 4a: Fiducial marker drift correction | Module 4b: Cross-correlation drift correction | Module 5: Chromatic aberration correction | Module 6: Image generation | Module 7: Single particle tracking | Module 8: Localization clustering | Module 9a: Fourier-ring correlation structural resolution | Module 9b: NeNA localization precision | Reference(s)                                  |
|------------------------|-------------------------------------------|------------------------|--------------------------------|---------------------------------------------|-----------------------------------------------|-------------------------------------------|----------------------------|------------------------------------|-----------------------------------|-----------------------------------------------------------|----------------------------------------|-----------------------------------------------|
| <b>Our manuscript</b>  | x                                         | x                      | x                              | x                                           | x                                             | x                                         | x                          | x                                  | x                                 | x                                                         | x                                      | [This manuscript]                             |
| <b>ZOLA-3D</b>         |                                           | x                      | x                              |                                             | x                                             |                                           | x                          |                                    |                                   |                                                           |                                        | (Aristov et al., 2018)                        |
| <b>Icy</b>             |                                           | x                      |                                |                                             |                                               |                                           |                            | x                                  | x                                 |                                                           |                                        | (de Chaumont et al., 2012)                    |
| <b>QuickPALM</b>       |                                           | x                      |                                |                                             |                                               |                                           | x                          |                                    |                                   |                                                           |                                        | (Henriques et al., 2010)                      |
| <b>GDSC SMLM</b>       |                                           | x                      | x                              | x                                           | x                                             |                                           | x                          | x                                  | x                                 | x                                                         |                                        | (Herbert, 2021)                               |
| <b>SMALL-LABS</b>      | x                                         | x                      |                                |                                             |                                               |                                           | x                          | x                                  |                                   |                                                           |                                        | (Isaacoff et al., 2019; Martens et al., 2021) |
| <b>FTM2</b>            | x                                         |                        |                                |                                             |                                               |                                           |                            |                                    |                                   |                                                           |                                        | (Jabermoradi et al., 2021)                    |
| <b>SR-Tesseler</b>     |                                           |                        |                                |                                             |                                               |                                           |                            |                                    | x                                 |                                                           |                                        | (Levet et al., 2015)                          |
| <b>LAMA</b>            |                                           |                        |                                |                                             |                                               | x                                         |                            |                                    | x                                 |                                                           | x                                      | (Malkusch and Heilemann, 2016)                |
| <b>DEEPSTORM-3D</b>    |                                           | x                      |                                |                                             |                                               |                                           |                            |                                    |                                   |                                                           |                                        | (Nehme et al., 2020)                          |
| <b>ThunderSTORM</b>    |                                           | x                      | x                              | x                                           | x                                             |                                           | x                          |                                    |                                   |                                                           |                                        | (Ovesny et al., 2014; Martens et al., 2018)   |
| <b>Radial Symmetry</b> |                                           | x                      |                                |                                             |                                               |                                           |                            |                                    |                                   |                                                           |                                        | (Parthasarathy, 2012)                         |
| <b>PALMsiever</b>      |                                           |                        |                                | x                                           | x                                             |                                           | x                          |                                    | x                                 |                                                           |                                        | (Pengo et al., 2015)                          |
| <b>SMAP</b>            |                                           | x                      |                                |                                             | x                                             | x                                         | x                          |                                    |                                   | x                                                         |                                        | (Ries, 2020)                                  |
| <b>Picasso</b>         |                                           | x                      |                                | x                                           | x                                             | x                                         | x                          |                                    | x                                 |                                                           |                                        | (Schnitzbauer et al., 2017)                   |
| <b>DECODE</b>          |                                           | x                      |                                |                                             |                                               |                                           | x                          |                                    |                                   |                                                           |                                        | (Speiser et al., 2021)                        |
| <b>Trackmate</b>       |                                           | x                      |                                |                                             |                                               |                                           |                            | x                                  |                                   |                                                           |                                        | (Tinevez et al., 2017)                        |
| <b>RapidSTORM</b>      |                                           | x                      | x                              | x                                           |                                               |                                           | x                          |                                    |                                   |                                                           |                                        | (Wolter et al., 2012)                         |
